# Supplementary material for: Association of Peripheral Arterial Occlusive Disease and Deep Venous Thrombosis with Risk of Consequent Sepsis Event: A Retrospective Population-Based Cohort Study
Source: MDPI journal article supplement (doi:10.3390/ijerph19116710), 2022-05-31
Supplement: s1 [file s1]

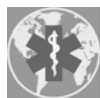

Supplemental Table S1. Cox proportional hazard model analysis for risk of mortality

|                        | Univariate       | p value | Multivariate †   |         |
|------------------------|------------------|---------|------------------|---------|
|                        | HR (95% C.I.)    |         | HR (95% C.I.)    | p value |
| Group                  |                  |         |                  |         |
| PAOD                   | Reference        |         | Reference        |         |
| DVT                    | 1.40 (1.30-1.50) | <0.001  | 1.54 (1.44-1.66) | <0.001  |
| Age                    | 1.06 (1.06-1.07) | <0.001  | 1.06 (1.05-1.06) | <0.001  |
| Sex                    |                  |         |                  |         |
| Female                 | Reference        |         | Reference        |         |
| Male                   | 1.80 (1.68-1.93) | <0.001  | 1.43 (1.33-1.54) | <0.001  |
| Hypertension           | 1.90 (1.77-2.04) | <0.001  | 0.89 (0.82-0.96) | 0.004   |
| Hyperlipidemia         | 0.91 (0.82-1.02) | 0.110   | -                | -       |
| Diabetes               | 2.07 (1.91-2.25) | <0.001  | 1.49 (1.37-1.62) | <0.001  |
| Ischemic heart disease | 1.73 (1.59-1.88) | <0.001  | 1.01 (0.92-1.10) | 0.834   |
| Chronic kidney disease | 2.61 (2.35-2.90) | <0.001  | 2.24 (2.02-2.49) | <0.001  |
| COPD                   | 2.45 (2.22-2.72) | <0.001  | 1.34 (1.20-1.49) | <0.001  |
| Intracranial bleeding  | 1.74 (1.35-2.24) | <0.001  | 1.24 (0.96-1.60) | 0.104   |
| Stroke                 | 2.11 (1.92-2.33) | <0.001  | 1.23 (1.11-1.36) | <0.001  |
| Malignancy             | 3.09 (2.85-3.35) | <0.001  | 2.67 (2.46-2.90) | <0.001  |
| Rheumatoid Arthritis   | 1.21 (0.87-1.67) | 0.254   | -                | -       |
| SLE                    | 1.22 (0.77-1.93) | 0.407   | -                | -       |
| Sjogren's syndrome     | 1.05 (0.63-1.74) | 0.859   | -                | -       |
| AS                     | 0.97 (0.50-1.86) | 0.919   | -                | -       |
| Psoriasis              | 1.31 (0.78-2.22) | 0.311   | -                | -       |
| Antibiotic             | 1.45 (1.35-1.57) | <0.001  | 1.20 (1.11-1.29) | <0.001  |

† Adjusted for age, sex, hypertension, diabetes, ischemic heart disease, chronic kidney disease, COPD, intracranial bleeding, stroke, malignancy, SLE, and antibiotic.

Supplemental Table S2. chemotherapy use and transplant organ status among PAOD and DVT group.

|                         | PAOD<br>(N = 4383) | DVT<br>(N = 4383) | ASD   |
|-------------------------|--------------------|-------------------|-------|
| Chemotherapy            | 160 (3.7)          | 292 (6.7)         | 0.137 |
| Transplant organ status | 20 (0.5)           | 31 (0.7)          | 0.033 |

Supplemental Table S3. The risk of sepsis among DVT compared with PAOD group

|                         | Univariate       | p value | Multivariate†    |         |
|-------------------------|------------------|---------|------------------|---------|
|                         | HR (95% C.I.)    |         | HR (95% C.I.)    | p value |
| Group                   |                  |         |                  |         |
| PAOD                    | Reference        |         | Reference        |         |
| DVT                     | 1.37 (1.24-1.51) | <0.001  | 1.41 (1.27-1.56) | <0.001  |
| Age                     | 1.06 (1.05-1.06) | <0.001  | 1.05 (1.05-1.05) | <0.001  |
| Sex                     |                  |         |                  |         |
| Female                  | Reference        |         | Reference        |         |
| Male                    | 1.39 (1.26-1.54) | <0.001  | 1.10 (0.99-1.21) | 0.087   |
| Hypertension            | 2.05 (1.85-2.26) | <0.001  | 0.97 (0.87-1.09) | 0.626   |
| Hyperlipidemia          | 1.12 (0.97-1.30) | 0.116   | -                | -       |
| Diabetes                | 2.25 (2.01-2.53) | <0.001  | 1.54 (1.37-1.74) | <0.001  |
| Ischemic heart disease  | 1.76 (1.56-1.99) | <0.001  | 1.00 (0.88-1.14) | 0.969   |
| Chronic kidney disease  | 2.89 (2.50-3.34) | <0.001  | 2.43 (2.10-2.81) | <0.001  |
| COPD                    | 2.56 (2.22-2.96) | <0.001  | 1.48 (1.28-1.73) | <0.001  |
| Intracranial bleeding   | 2.80 (2.07-3.77) | <0.001  | 1.90 (1.40-2.58) | <0.001  |
| Stroke                  | 2.70 (2.37-3.07) | <0.001  | 1.60 (1.40-1.84) | <0.001  |
| Malignancy              | 2.12 (1.87-2.41) | <0.001  | 1.68 (1.48-1.92) | <0.001  |
| Rheumatoid Arthritis    | 1.18 (0.74-1.88) | 0.481   | -                | -       |
| SLE                     | 2.16 (1.30-3.59) | 0.003   | 4.28 (2.56-7.16) | <0.001  |
| Sjogren's syndrome      | 1.11 (0.56-2.23) | 0.762   | -                | -       |
| AS                      | 0.42 (0.10-1.66) | 0.215   | -                | -       |
| Psoriasis               | 1.37 (0.65-2.87) | 0.411   | -                | -       |
| Antibiotic              | 1.59 (1.43-1.76) | <0.001  | 1.37 (1.23-1.52) | <0.001  |
| Chemotherapy            | 2.03 (1.68-2.46) | <0.001  | 1.90 (1.56-2.32) | <0.001  |
| Transplant organ status | 1.04 (0.56-1.93) | 0.905   | -                | -       |

♦ Adjusted for age, sex, hypertension, diabetes, ischemic heart disease, chronic kidney disease, COPD, intracranial bleeding, stroke, malignancy, rheumatoid arthritis, SLE, antibiotic, and chemotherapy.
